# Supplementary material
Source: publisher figshare collection journal article supplement (https://rs.figshare.com/ndownloader/files/13709033)
Supplement: Supplementary file 1 [file 13709033]

## Sheet: Summary data per female
FocalID	Number of POG-MC pairs	%AttractedPairs	%DispersedPairs	%NeutralPairs	POG_%initiates_next_grooming	POG_%not_initiates_next_grooming	POG_%Groomer	POG_%Groomee	POG%_Bidirectional	POG_Number_grooming_bouts_observed	POG_Total_SDB_rate	POG_Affiliative_rate	POG_Aggression_rate	POG_Approach_rate	POG_%time_with_neighbour1m	POG_%time_with_neighbour5m	MC_Total_SDB_rate	MC_Affiliative_rate	MC_Aggression_rate	MC_Approach_rate	MC_%time_with_neighbour1m	MC_%time_with_neighbour5m	MC_%initiates_next_grooming	MC_%not_initiates_next_grooming	MC_%Groomer	MC_%Groomee	MC%_Bidirectional	MC_Number_grooming_bouts_observed
R101	6	66.6667	33.3333	0	66.6667	33.3333	83.3333	16.6667	0	6	0.130719	0	0.172315	0.163881	0	44.3452	0.439677	0	0.0226916	0	0.833333	79.6429	0	100	50	50	0	3
P78	6	66.6667	33.3333	0	66.6667	33.3333	66.6667	33.3333	0	6	0.502854	0.0134953	0.0405955	0.0540908	8.75	69.8864	0.33878	0	0.101276	0.0961538	0	61.9697	100	0	100	0	0	2
O64	10	60	40	0	70	30	90	10	0	10	0.254778	0.063854	0.0507875	0.186907	5.35714	76.271	0.213176	0.0113636	0.175364	0.0607462	0	61.553	71.4286	28.5714	71.4286	28.5714	0	7
O65	10	60	40	0	90	10	70	30	0	10	0.324072	0.0679071	0.029459	0.159114	25	100	0.417684	0.0578523	0.113215	0.0800003	0	63.4314	85.7143	14.2857	71.4286	28.5714	0	7
O66	6	66.6667	16.6667	16.6667	75	25	75	25	0	4	0.152004	0.0856522	0.383591	0.386619	5	76.8148	0.144346	0	0.0121344	0	0	46.4815	0	100	100	0	0	1
N50	9	66.6667	22.2222	11.1111	42.8571	57.1429	85.7143	14.2857	0	7	0.122355	0.101822	0.0115876	0.158653	8.51521	74.9695	0.211411	0.0221621	0.0131449	0.0473618	2.5056	67.1513	100	0	50	50	0	2
N55	8	100	0	0	62.5	37.5	87.5	12.5	0	8	0.306227	0.0228609	0.0565344	0.0922883	2.08333	80.7692	0.72373	0.0190694	0.0524984	0	0.641026	54.2735	100	0	100	0	0	1
L34	10	80	20	0	90	10	50	30	20	10	0.32877	0.0877838	0.0314383	0.298774	0	43.2759	0.356292	0.213675	0.00975847	0.2	6.25	27.1027	100	0	66.6667	33.3333	0	3
L35	10	80	20	0	60	40	90	10	0	10	0.369302	0.361806	0.166931	0.228895	5.55556	48.8269	0.426921	0.0916053	0.016948	0.0723718	6.11111	53.5815	33.3333	66.6667	66.6667	0	33.3333	3
K11	9	55.5556	44.4444	0	57.1429	42.8571	71.4286	28.5714	0	7	0.310461	0.178123	0.00854701	0.33871	0	87.1985	0.273618	0.0106838	0.0138889	0.244658	2.22635	50.2288	80	20	60	40	0	5
K19	6	83.3333	16.6667	0	33.3333	66.6667	83.3333	16.6667	0	6	0.0784279	0.150149	0.136323	0.153292	16	61.9472	0.179373	0.0110668	0.233392	0.0221337	1.81818	49.986	50	50	50	50	0	4
I2	9	44.4444	44.4444	11.1111	42.8571	57.1429	85.7143	0	14.2857	7	0.453694	0.0236598	0.0661376	0.0380452	3.91686	72.1719	0.283426	0.132662	0.0308067	0.126319	3.3318	54.5639	50	50	25	50	25	4
W52	6	100	0	0	50	50	66.6667	33.3333	0	6	0.25298	0.00697195	0.0341272	0.137324	0.434783	47.2536	0.176817	0.0208182	0.00697195	0	1.36957	17.7246						0
W56	9	66.6667	33.3333	0	37.5	62.5	62.5	37.5	0	8	0.167121	0.0376296	0.118208	0.0626305	6.38298	57.1919	0.49631	0.003367	0.0554714	0.0326914	1.69471	51.6333	100	0	50	25	25	4
R50	9	77.7778	11.1111	11.1111	62.5	37.5	100	0	0	8	0.546654	0.00609329	0.027532	0.118505	7.14286	65.2574	0.459021	0.00694444	0.00689275	0	1.02041	32.3465	0	100	100	0	0	2
Q55	7	85.7143	0	14.2857	60	40	60	40	0	5	0.140619	0.0343312	0.0316361	0.073205	0	57.6477	0.19758	0	0.032986	0.0325679	18.4587	70.9429						0
O51	8	87.5	12.5	0	75	25	62.5	37.5	0	8	0.192441	0.0164257	0.0301177	0.241042	20.7843	88.7255	0.437305	0.00318471	0.00490773	0.00636943	3.46138	54.4218	66.6667	33.3333	66.6667	0	33.3333	3
O52	2	50	0	50	100	0	0	100	0	1	0.233333	0	0.00833333	0.166667	0	25	0.558333	0	0.00833333	0	0	12.5						0
H58	6	66.6667	16.6667	16.6667	40	60	40	60	0	5	0.255551	0.0143519	0.00318674	0.0235031	2.77381	61.119	0.248414	0.00596452	0.114676	0.00807433	0.77381	72.881	0	100	100	0	0	1
H61	8	62.5	37.5	0	100	0	33.3333	66.6667	0	6	0.249655	0.0445046	0.118391	0.132878	7.69363	65.6822	0.716722	0.0137693	0.0785873	0.00254738	0.37037	53.011	33.3333	66.6667	0	66.6667	33.3333	3

## Sheet: Full dataset
POG/MC_pair	Focal_ID	Focal_age	Pair's type	POG/MC_duration	POG/MC_duration_min	POG_Date	POG_Duration	POG_Duration_min	POG_end_time_treated	POG_noGI	POG_Start	POG_Groomee	POG_Groomer	POG_GI_end	POG_GI_duration	POG_GI_duration_min	POG_Distance_Mini	POG_VA	POG_VA_rate	POG_NGI_initiator	POG_Partner_ID	POG_Direction_GI	POG_end	POG_tot_SDB	POG_tot_SDB_rate	POG_Affi	POG_Affi_rate	POG_Agg	POG_Agg_rate	POG_submi	POG_submi_rate	POG_App	POG_App_rate	POG_Leave	POG_Leave_rate	POG_scan_tot	POG_no-neigh	POG_noneigh_%	POG_neigh_0-5_%	POG_neigh_0-1	POG_neigh_0-1_%	POG_neigh_1-2	POG_neigh_1-2_%	POG_neigh_2-5	POG_neigh_2-5_%	POG_numb_neigh	POG_numb_neigh_rate	MC_Date	MC_Start
1	L35	10	att	00:27:31	27.31	2017-04-08	00:27:31	27.31		0	13:35:09	M	Unk	NA	NA	NA	5	NA	NA	2	M	1	14:02:40	19	0.695716	1	0.0366166	1	0.0366166	0	0	1	0.0366166	1	0.0366166	26	11	42.3077	57.6923	0	0	2	7.69231	14	53.8462	7	0.269231	2017-04-21	13:30:00
2	W56	13	att	00:42:47	42.47	2017-04-09	00:42:47	42.47		0	10:13:13	J	F	10:21:40	00:08:27	8.27	5	NA	NA	1	L34	2	10:56:00	5	0.11773	0	0	4	0.0941841	0	0	1	0.023546	0	0	39	13	33.3333	66.6667	0	0	1	2.5641	26	66.6667	7	0.179487	2017-04-18	10:13:00
3	P78	6	att	00:12:35	12.35	2017-04-09	00:12:35	12.35		0	10:58:40	M	J	11:00:00	00:01:20	1.2	2	NA	NA	1	O65	2	11:11:15	3	0.242915	1	0.0809717	1	0.0809717	0	0	2	0.161943	1	0.0809717	8	1	12.5	87.5	3	37.5	1	12.5	3	37.5	3	0.375	2017-04-18	11:18:00
4	O65	7	att	00:16:46	16.46	2017-04-13	00:16:46	16.46		0	15:33:40	M	J	15:43:17	00:09:37	9.37	3	4	0.426894	2	unk	2	15:50:26	2	0.121507	1	0.0607533	0	0	0	0	2	0.121507	0	0	4	0	0	100	0	0	1	25	3	75	3	0.75	2017-04-19	15:28:00
5	N55	8	att	00:13:11	13.11	2017-04-13	00:13:11	13.11		0	16:10:49	J	W52	16:23:25	00:12:36	12.36	1	11	0.889968	1	H58	1	16:24:00	1	0.0762777	1	0.0762777	0	0	0	0	1	0.0762777	0	0	3	0	0	100	0	0	0	0	3	100	2	0.666667	2017-04-25	16:06:00
6	O51	20	att	00:39:25	39.25	2017-04-18	00:39:25	39.25		0	13:46:00	M	H58	13:48:00	00:02:00	2	7	1	0.5	2	saM	2	14:25:25	22	0.56051	2	0.0509554	2	0.0509554	0	0	1	0.0254777	1	0.0254777	34	6	17.6471	82.3529	5	14.7059	8	23.5294	15	44.1176	4	0.117647	2017-04-20	14:01:00
7	R50	17	att	00:03:01	3.01	2017-04-18	00:03:01	3.01		0	16:14:33	O50	R101	16:17:34	00:03:01	3.01	7	4	1.3289	1	M	1	16:17:34	7	2.32558	0	0	0	0	0	0	1	0.332226	0	0	NA	NA			NA		NA		NA		NA		2017-04-19	16:14:00
8	W52	13	att	00:10:07	10.07	2017-04-19	00:10:07	10.07		0	10:18:00	saM	W56	10:22:56	00:04:56	4.56	1	3	0.657895	1	J	1	10:28:07	0	0	0	0	1	0.0993049	0	0	1	0.0993049	0	0	3	1	33.3333	66.6667	0	0	1	33.3333	2	66.6667	2	0.666667	2017-05-01	10:18:00
9	W56	13	disp	00:10:11	10.11	2017-04-19	00:11:22	11.22	10:54:55	0	10:44:44	O50	O64	10:54:50	00:10:06	10.06	3	11	1.09344	2	L35	2	10:56:06	1	0.098912	0	0	0	0	0	0	0	0	0	0	4	4	100	0	0	0	0	0	0	0	0	0	2017-04-23	10:37:00
10	Q55	18	att	00:13:58	13.58	2017-04-19	00:13:58	13.58		0	11:20:00	M	J	11:32:00	00:12:00	12	1	2	0.166667	2	M	1	11:33:58	2	0.147275	0	0	1	0.0736377	0	0	0	0	0	0	5	0	0		0	0	4	80	4	80	3	0.6	2017-04-23	11:45:00
11	P78	6	disp	00:13:00	13	2017-04-19	00:48:58	48.58	12:07:30	0	11:54:30	M	O64	11:56:00	00:01:30	1.3	6	1	0.769231	1	saF	2	12:43:28	14	1.07692	0	0	0	0	0	0	0	0	0	0	11	9	81.8182	18.1818	0	0	0	0	2	18.1818	3	0.272727	2017-04-21	11:47:00
12	L35	10	att	00:02:50	2.5	2017-04-20	00:02:50	2.5		0	12:29:00	I2	W56	12:31:00	00:02:00	2	7	4	2	1	F51	1	12:31:50	0	0	1	0.4	1	0.4	1	0.4	1	0.4	0	0	NA	NA			NA		NA		NA		NA		2017-04-26	12:29:00
13	K11	11	disp	00:08:00	8	2017-04-20	00:49:11	49.11	13:08:00	0	13:00:00	M	saM	13:20:21	00:20:21	20.21	3	21	1.03909	1	M	1	13:49:11	2	0.25	0	0	0	0	1	0.125	0	0	0	0	3	0	0	100	0	0	0	0	3	100	1	0.333333	2017-04-22	13:00:00
14	H58	27	att	00:34:10	34.1	2017-04-20	00:34:10	34.1		0	15:32:48	Q55	O65	15:36:00	00:03:12	3.12	4	3	0.961538	2	H61	2	16:06:58	12	0.351906	0	0	0	0	0	0	0	0	1	0.0293255	30	20	66.6667	33.3333	0	0	0	0	10	33.3333	8	0.266667	2017-04-24	15:47:00
15	O52	20	att	00:03:00	3	2017-04-21	00:03:00	3		0	16:20:00	saF	K21	16:22:50	00:02:50	2.5	4	4	1.6	1	K21	2	16:23:00	0	0	0	0	0	0	0	0	1	0.333333	0	0	NA	NA			NA		NA		NA		NA		2017-04-22	16:17:00
16	Q55	18	neut	01:00:00	60	2017-04-22	01:00:00	60		1	14:03:48	P78	Q91	14:05:48	00:02:00	2	7	4	2	Ø	Ø	Ø	15:03:48	5	0.0833333	0	0	1	0.0166667	0	0	0	0	0	0	58	45	77.5862	22.4138	0	0	0	0	13	22.4138	2	0.0344828	2017-04-24	14:10:00
17	O64	7	disp	00:44:00	44	2017-04-23	00:45:39	45.39	13:52:26	0	13:08:26	Q55	O51	13:18:57	00:10:31	10.31	5	11	1.06693	1	J	1	13:54:05	20	0.454545	0	0	0	0	0	0	0	0	0	0	41	8	19.5122	80.4878	0	0	4	9.7561	27	65.8537	4	0.097561	2017-04-24	13:07:00
18	K19	11	att	00:07:45	7.45	2017-04-24	00:07:45	7.45		0	11:21:30	H58	L35	11:23:00	00:01:30	1.3	6	2	1.53846	1	O51	1	11:29:15	0	0	0	0	0	0	0	0	1	0.134228	0	0	5	3	60	40	0	0	2	40	0	0	2	0.4	2017-04-25	11:51:00
19	O66	7	att	00:04:55	4.55	2017-04-24	00:04:55	4.55		0	11:52:50	H58	J	11:54:03	00:01:13	1.13	6	2	1.76991	1	O51	2	11:57:45	0	0	1	0.21978	1	0.21978	0	0	1	0.21978	0	0	2	1	50	50	0	0	0	0	1	50	2	1	2017-04-26	11:57:00
20	K11	11	att	00:11:16	11.16	2017-04-25	00:11:16	11.16		0	10:30:30	P72	O50	10:39:15	00:08:45	8.45	3	5	0.591716	2	O50	2	10:41:46	1	0.0896057	1	0.0896057	0	0	0	0	0	0	0	0	11	0	0	100	0	0	0	0	11	100	2	0.181818	2017-05-02	10:20:00
21	O51	20	att	00:01:23	1.23	2017-04-25	00:01:23	1.23		0	11:10:10	O52	K21	11:11:33	00:01:23	1.23	7	3	2.43902	1	F51	1	11:11:33	0	0	0	0	0	0	0	0	0	0	0	0	NA	NA			NA		NA		NA		NA		2017-04-27	10:50:00
22	I2	12	disp	00:01:00	1	2017-04-25	00:04:29	4.29	11:19:45	0	11:18:45	M	J	11:21:31	00:02:46	2.46	5	3	1.21951	2	J	1	11:23:14	1	1	0	0	0	0	0	0	0	0	0	0	NA	NA			NA		NA		NA		NA		2017-04-27	11:14:00
23	R50	17	att	00:05:31	5.31	2017-04-25	00:05:31	5.31		0	11:23:14	J	I2	11:25:15	00:02:01	2.01	2	2	0.995025	1	M	1	11:28:45	0	0	0	0	0	0	0	0	1	0.188324	0	0	2	1	50	50	0	0	0	0	1	50	1	0.5	2017-04-26	11:22:00
24	L34	10	att	00:22:53	22.53	2017-04-25	00:22:53	22.53		0	14:44:00	M	J	14:51:00	00:07:00	7	3	7	1	1	F53	1	15:06:53	8	0.355082	0	0	0	0	0	0	1	0.0443853	0	0	16	13	81.25	18.75	0	0	0	0	3	18.75	1	0.0625	2017-04-26	14:22:00
25	O64	7	att	00:08:22	8.22	2017-04-25	00:08:22	8.22		0	15:30:34	J	K11	15:37:39	00:07:05	7.05	5	8	1.13475	2	K11	1	15:38:56	2	0.243309	2	0.243309	0	0	0	0	0	0	0	0	6	0	0	100	0	0	1	16.6667	5	83.3333	2	0.333333	2017-04-26	15:13:00
26	O64	7	att	00:09:27	9.27	2017-04-26	00:09:27	9.27		0	10:38:00	saM	J	10:41:17	00:03:17	3.17	7	3	0.946372	2	J	1	10:47:27	1	0.107875	1	0.107875	1	0.107875	0	0	0	0	0	0	8	2	25	75	0	0	0	0	6	75	3	0.375	2017-05-05	10:58:00
27	K19	11	att	00:01:53	1.53	2017-04-26	00:01:53	1.53		0	11:05:52	N55	W52	11:07:10	00:01:18	1.18	6	2	1.69492	1	N55	1	11:07:45	0	0	1	0.653595	1	0.653595	0	0	1	0.653595	0	0	NA	NA			NA		NA		NA		NA		2017-04-28	11:15:00
28	O65	7	disp	00:02:25	2.25	2017-04-26	00:06:22	6.22	14:03:56	0	14:01:31	Q55	K11	14:03:58	00:02:27	2.27	5	3	1.32159	1	saF	1	14:07:53	1	0.444444	0	0	0	0	0	0	0	0	0	0	NA	NA			NA		NA		NA		NA		2017-04-27	14:20:00
29	I2	12	disp	00:34:00	34	2017-04-26	01:00:00	60	15:56:33	1	15:22:33	O64	saM	15:30:00	00:07:27	7.27	3	12	1.65062	Ø	Ø	Ø	16:22:33	9	0.264706	0	0	0	0	1	0.0294118	0	0	0	0	32	16	50	50	0	0	0	0	16	50	9	0.28125	2017-04-28	15:06:00
30	K11	11	disp	00:52:00	52	2017-04-27	01:00:00	60	12:37:47	1	11:45:47	M	Q55	11:58:00	00:12:13	12.13	7	8	0.659522	Ø	Ø	Ø	12:45:47	0	0	0	0	4	0.0769231	0	0	1	0.0192308	1	0.0192308	49	18	36.7347	63.2653	0	0	3	6.12245	24	48.9796	7	0.142857	2017-05-04	11:44:00
31	H58	27	disp	00:02:50	2.5	2017-04-27	00:05:40	5.4	13:58:50	0	13:56:00	M	L34	13:57:10	00:01:10	1.1	5	4	3.63636	2	M	1	14:01:40	0	0	0	0	0	0	0	0	0	0	0	0	NA	NA			NA		NA		NA		NA		2017-04-28	14:00:00
32	W56	13	disp	00:33:00	33	2017-04-27	00:58:57	58.57	15:39:30	0	15:06:30	F	F	15:07:49	00:01:19	1.19	7	1	0.840336	2	O51	2	16:05:27	4	0.121212	0	0	7	0.212121	2	0.0606061	0	0	1	0.030303	31	20	64.5161	35.4839	0	0	1	3.22581	9	29.0323	7	0.225806	2017-04-29	15:16:00
33	L34	10	att	00:03:47	3.47	2017-04-28	00:03:47	3.47		0	10:39:40	E50	U55	10:41:48	00:02:08	2.08	7	2	0.961538	1	R50	3	10:43:27	1	0.288184	0	0	1	0.288184	0	0	1	0.288184	0	0	1	1	100	0	0	0	0	0	0	0	0	0	2017-05-01	11:06:00
34	O66	7	att	00:04:07	4.07	2017-04-28	00:04:07	4.07		0	10:53:00	J	M	10:57:07	00:04:07	4.07	7	3	0.737101	2	M	1	10:57:07	0	0	1	0.2457	0	0	0	0	0	0	0	0	1	0	0	100	0	0	0	0	1	100	2	2	2017-05-01	10:49:00
35	L35	10	att	00:01:11	1.11	2017-04-28	00:01:11	1.11		0	12:42:40	H58	K11	12:43:48	00:01:08	1.08	5	4	3.7037	2	H58	1	12:43:51	1	0.900901	1	0.900901	1	0.900901	0	0	0	0	0	0	NA	NA			NA		NA		NA		NA		2017-04-29	12:51:00
36	P78	6	att	00:02:45	2.45	2017-04-28	00:02:45	2.45		0	12:59:25	M	O66	13:00:40	00:01:15	1.15	7	3	2.6087	2	J	2	13:02:10	1	0.408163	0	0	0	0	0	0	0	0	0	0	1	0	0	100	0	0	0	0	1	100	1	1	2017-04-29	12:55:00
37	N50	8	att	00:02:10	2.1	2017-04-28	00:02:10	2.1		0	13:18:00	O65	saF	13:19:47	00:01:47	1.47	7	2	1.36054	2	I2	2	13:20:10	0	0	0	0	0	0	0	0	0	0	0	0	NA	NA			NA		NA		NA		NA		2017-05-01	12:48:00
38	W52	13	att	00:01:38	1.38	2017-04-28	00:01:38	1.38		0	14:29:03	F53	N55	14:30:41	00:01:38	1.38	5	2	1.44928	1	J	1	14:30:41	0	0	0	0	0	0	0	0	1	0.724638	0	0	NA	NA			NA		NA		NA		NA		2017-05-03	14:33:00
39	O64	7	disp	00:02:03	2.03	2017-04-28	00:06:28	6.28	14:43:03	0	14:41:00	J	W56	14:43:40	00:02:40	2.4	6	1	0.416667	1	W56	2	14:47:28	0	0	0	0	0	0	0	0	0	0	0	0	1	0	0	100	0	0	0	0	1	100	3	3	2017-04-29	14:57:00
40	L35	10	disp	00:33:54	33.54	2017-04-29	00:39:15	39.15	14:49:54	0	14:16:00	M	H58	14:22:00	00:06:00	6	5	8	1.33333	2	J	1	14:55:15	20	0.596303	0	0	2	0.0596303	2	0.0596303	0	0	0	0	31	18	58.0645	41.9355	0	0	1	3.22581	12	38.7097	6	0.193548	2017-05-01	13:57:00
41	L34	10	att	00:22:13	22.13	2017-05-01	00:22:13	22.13		0	14:41:00	M	J	14:42:27	00:01:27	1.27	7	1	0.787402	1	J	1	15:03:13	7	0.316313	1	0.0451875	0	0	0	0	1	0.0451875	0	0	19	15	78.9474	21.0526	0	0	0	0	4	21.0526	2	0.105263	2017-05-03	14:42:00
42	K19	11	att	00:20:42	20.42	2017-05-01	00:20:42	20.42		0	15:16:05	M	saM	15:17:26	00:01:21	1.21	5	2	1.65289	2	saM	1	15:36:47	4	0.195886	1	0.0489716	2	0.0979432	2	0.0979432	0	0	1	0.0489716	18	13	72.2222	27.7778	0	0	1	5.55556	4	22.2222	4	0.222222	2017-05-09	15:05:00
43	Q55	18	att	00:45:50	45.5	2017-05-01	00:45:50	45.5		0	16:06:10	K19	O51	16:08:10	00:02:00	2	4	2	1	NA	NA	NA	16:52:00	9	0.197802	1	0.021978	1	0.021978	1	0.021978	1	0.021978	0	0	44	18	40.9091	59.0909	0	0	6	13.6364	20	45.4545	6	0.136364	2017-05-02	15:57:00
44	W56	13	att	00:27:49	27.49	2017-05-02	00:27:49	27.49		0	11:07:27	Q55	M	11:09:28	00:02:01	2.01	7	3	1.49254	2	M	1	11:35:16	4	0.145507	0	0	1	0.0363769	1	0.0363769	0	0	1	0.0363769	26	22	84.6154	15.3846	0	0	0	0	4	15.3846	3	0.115385	2017-05-03	10:58:00
45	H61	27	att	00:11:10	11.1	2017-05-02	00:11:10	11.1		0	11:40:05	L35	W56	11:41:50	00:01:45	1.45	4	4	2.75862	1	M	1	11:51:15	0	0	0	0	0	0	0	0	2	0.18018	0	0	9	3	33.3333	66.6667	2	22.2222	0	0	5	55.5556	4	0.444444	2017-05-03	11:56:00
46	R50	17	neut	01:00:00	60	2017-05-02	01:00:00	60		1	13:30:12	W56	P72	13:31:20	00:01:08	1.08	7	2	1.85185	Ø	Ø	Ø	14:30:12	30	0.5	0	0	2	0.0333333	0	0	1	0.0166667	1	0.0166667	59	32	54.2373	45.7627	0	0	1	1.69492	26	44.0678	8	0.135593	2017-05-12	13:33:00
47	P78	6	disp	00:04:00	4	2017-05-02	00:18:06	18.06	15:01:20	0	14:57:20	J	M	15:00:30	00:03:10	3.1	3	2	0.645161	1	J	2	15:15:26	2	0.5	0	0	0	0	0	0	0	0	0	0	NA	NA			NA		NA		NA		NA	#VALUE!	2017-05-04	15:10:00
48	L35	10	att	00:02:10	2.1	2017-05-02	00:02:10	2.1		0	14:57:00	J	M	14:58:02	00:01:02	1.02	5	1	0.980392	1	O50	1	14:59:10	0	0	0	0	0	0	0	0	0	0	0	0	NA	NA			NA		NA		NA		NA		2017-05-03	15:18:00
49	I2	12	att	00:05:04	5.04	2017-05-02	00:05:04	5.04		0	15:44:00	J	L35	15:48:02	00:04:02	4.02	2	7	1.74129	1	L35	1	15:49:04	6	1.19048	0	0	3	0.595238	1	0.198413	1	0.198413	0	0	2	0	0	100	0	0	2	100	0	0	1	0.5	2017-05-04	15:41:00
50	K19	11	disp	00:15:06	15.06	2017-05-03	00:24:58	24.58	13:57:36	0	13:42:30	M	O51	13:43:50	00:01:20	1.2	3	1	0.833333	2	M	1	14:07:28	0	0	1	0.0664011	1	0.0664011	0	0	0	0	1	0.0664011	11	3	27.2727	72.7273	0	0	3	27.2727	7	63.6364	2	0.181818	2017-05-04	13:51:00
51	H58	27	att	00:14:40	14.4	2017-05-04	00:14:40	14.4		0	10:13:30	M	J	10:15:16	00:01:46	1.46	5	1	0.684932	1	P72	2	10:28:10	6	0.416667	1	0.0694444	0	0	0	0	1	0.0694444	0	0	10	2	20	80	1	10	1	10	6	60	4	0.4	2017-05-08	10:19:00
52	N50	8	att	00:14:00	14	2017-05-04	00:14:00	14		0	10:30:50	H58	P72	10:37:30	00:06:40	6.4	7	6	0.9375	2	J	1	10:44:50	1	0.0714286	1	0.0714286	0	0	0	0	0	0	0	0	13	9	69.2308	30.7692	0	0	0	0	4	30.7692	2	0.153846	2017-05-05	10:30:00
53	K19	11	att	00:14:01	14.01	2017-05-04	00:14:01	14.01		0	11:16:29	M	saM	11:27:20	00:10:51	10.51	5	7	0.666032	2	O51	2	11:30:30	2	0.142755	0	0	0	0	0	0	0	0	0	0	13	4	30.7692	69.2308	0	0	2	15.3846	9	69.2308	4	0.307692	2017-05-08	11:02:00
54	R50	17	disp	00:16:00	16	2017-05-04	00:18:47	18.47	14:50:24	0	14:34:24	H61	W56	14:36:20	00:01:56	1.56	5	3	1.92308	1	F51	1	14:53:11	0	0	0	0	2	0.125	0	0	0	0	0	0	12	12	100	0	0	0	0	0	0	0	0	0	2017-05-05	14:24:00
55	H58	27	att	00:52:30	52.3	2017-05-05	00:52:30	52.3		0	11:26:11	M	P78	11:31:08	00:04:57	4.57	7	1	0.218818	1	M	1	12:18:41	21	0.40153	0	0	1	0.0191205	0	0	2	0.0382409	0	0	48	14	29.1667	70.8333	1	2.08333	5	10.4167	34	70.8333	7	0.145833	2017-05-09	11:49:00
56	Q55	18	att	00:09:16	9.16	2017-05-05	00:09:16	9.16		0	13:46:04	M	O65	13:49:10	00:03:06	3.06	5	1	0.326797	1	J	1	13:55:20	1	0.10917	2	0.218341	1	0.10917	1	0.10917	2	0.218341	0	0	8	4	50	50	0	0	2	25	2	25	4	0.5	2017-05-09	13:42:00
57	L35	10	disp	00:06:00	6	2017-05-05	00:23:40	23.4	16:14:50	0	16:08:50	M	H58	16:18:16	00:09:26	9.26	6	3	0.323974	2	J	1	16:32:30	0	0	0	0	0	0	0	0	0	0	0	0	3	3	100	0	0	0	0	0	0	0	0	0	2017-05-16	15:47:00
58	O51	20	att	00:12:43	12.43	2017-05-08	00:12:43	12.43		0	11:20:00	L35	saF	11:26:44	00:06:44	6.44	5	5	0.776398	1	L35	2	11:32:43	4	0.321802	1	0.0804505	1	0.0804505	0	0	1	0.0804505	0	0	10	0	0	100	1	10	0	0	9	90	4	0.4	2017-05-09	11:09:00
59	R101	4	att	00:26:44	26.44	2017-05-08	00:26:44	26.44		0	12:47:00	H61	K19	12:54:00	00:07:00	7	5	4	0.571429	1	M	1	13:13:44	10	0.378215	0	0	1	0.0378215	1	0.0378215	0	0	0	0	24	20	83.3333	16.6667	0	0	1	4.16667	3	12.5	2	0.0833333	2017-05-17	12:53:00
60	L34	10	att	00:01:31	1.31	2017-05-09	00:01:31	1.31		0	10:20:30	saF	O66	10:22:01	00:01:31	1.31	7	3	2.29008	1	saF	1	10:22:01	1	0.763359	0	0	0	0	0	0	0	0	0	0	NA	NA			NA		NA		NA		NA		2017-05-17	10:37:00
61	O64	7	disp	00:10:44	10.44	2017-05-09	00:13:32	13.32	10:51:44	0	10:41:00	M	P78	10:42:47	00:01:47	1.47	7	2	1.36054	1	L35	1	10:54:32	0	0	3	0.287356	0	0	0	0	0	0	0	0	8	1	12.5	87.5	3	37.5	2	25	2	25	2	0.25	2017-05-12	10:24:00
62	P78	6	att	00:06:15	6.15	2017-05-09	00:06:15	6.15		0	11:30:15	M	H58	11:32:18	00:02:03	2.03	7	1	0.492611	1	J	1	11:36:30	2	0.325203	0	0	1	0.162602	0	0	1	0.162602	0	0	6	3	50	50	0	0	0	0	3	50	2	0.333333	2017-05-10	11:30:00
63	O66	7	att	00:00:50	0.5	2017-05-09	00:00:50	0.5		0	14:04:30	M	Q91	14:05:20	00:00:50	0.5	3	2	4	1	M	1	14:05:20	0	0	0	0	1	2	0	0	1	2	0	0	NA	NA			NA		NA		NA		NA		2017-05-10	14:27:00
64	K11	11	att	00:01:36	1.36	2017-05-09	00:01:36	1.36		0	14:47:05	H58	O50	14:48:10	00:01:05	1.05	7	2	1.90476	1	O50	1	14:48:41	0	0	1	0.735294	0	0	0	0	1	0.735294	0	0	NA	NA			NA		NA		NA		NA		2017-05-10	14:38:00
65	I2	12	neut	01:00:00	60	2017-05-09	01:00:00	60		1	15:34:25	M	J	15:36:00	00:01:35	1.35	7	2	1.48148	Ø	Ø	Ø	16:34:25	23	0.383333	0	0	0	0	2	0.0333333	1	0.0166667	1	0.0166667	52	16	30.7692	69.2308	1	1.92308	3	5.76923	31	59.6154	7	0.134615	2017-05-11	15:07:00
66	O52	20	neut	01:00:00	60	2017-05-10	01:00:00	60		1	10:05:25	M	K19	10:11:35	00:06:10	6.1	7	2	0.327869	Ø	Ø	Ø	11:05:25	28	0.466667	0	0	1	0.0166667	0	0	0	0	0	0	56	42	75	25	0	0	1	1.78571	13	23.2143	3	0.0535714	2017-05-11	10:32:00
67	N55	8	att	00:05:41	5.41	2017-05-10	00:05:41	5.41		0	11:51:32	M	R101	11:55:00	00:03:28	3.28	4	6	1.82927	1	M	1	11:57:13	7	1.2939	0	0	2	0.369686	0	0	1	0.184843	0	0	4	0	0	100	0	0	0	0	4	100	2	0.5	2017-05-15	12:03:00
68	O64	7	att	00:02:45	2.45	2017-05-10	00:02:45	2.45		0	12:53:30	O50	J	12:55:25	00:01:55	1.55	1	4	2.58065	1	J	1	12:56:15	1	0.408163	0	0	0	0	0	0	1	0.408163	0	0	NA	NA			NA		NA		NA		NA		2017-05-16	13:20:00
69	H61	27	att	00:25:55	25.55	2017-05-10	00:25:55	25.55		0	13:28:00	I2	R50	13:29:47	00:01:47	1.47	2	2	1.36054	1	O51	2	13:53:55	12	0.469667	0	0	1	0.0391389	0	0	1	0.0391389	1	0.0391389	23	10	43.4783	56.5217	3	13.0435	2	8.69565	9	39.1304	5	0.217391	2017-05-11	13:15:00
70	L34	10	disp	00:00:50	0.5	2017-05-10	00:01:21	1.21	14:43:18	0	14:42:28	M	K11	14:43:49	00:01:21	1.21	7	3	2.47934	1	J	1	14:43:49	0	0	0	0	0	0	0	0	0	0	0	0	NA	NA			NA		NA		NA		NA		2017-05-17	15:01:00
71	N55	8	att	00:01:15	1.15	2017-05-10	00:01:15	1.15		0	14:53:15	M	J	14:54:30	00:01:15	1.15	5	1	0.869565	2	M	1	14:54:30	0	0	0	0	0	0	0	0	0	0	0	0	NA	NA			NA		NA		NA		NA		2017-05-11	14:29:00
72	H58	27	neut	01:00:00	60	2017-05-10	01:00:00	60		1	14:57:00	P78	L35	14:58:00	00:01:00	1	7	1	1	Ø	Ø	Ø	15:57:00	14	0.233333	1	0.0166667	0	0	0	0	2	0.0333333	0	0	56	28	50	50	1	1.78571	4	7.14286	22	39.2857	9	0.160714	2017-05-12	15:27:00
73	L35	10	att	00:32:05	32.05	2017-05-11	00:32:05	32.05		0	11:38:50	W56	P72	11:40:00	00:01:10	1.1	2	3	2.72727	1	J	1	12:10:55	13	0.405616	0	0	1	0.0312012	1	0.0312012	1	0.0312012	0	0	30	22	73.3333	26.6667	0	0	3	10	5	16.6667	3	0.1	2017-05-24	11:54:00
74	W52	13	att	00:11:54	11.54	2017-05-11	00:11:54	11.54		0	13:58:01	M	R101	14:01:50	00:03:49	3.49	7	2	0.573066	2	saF	1	14:09:55	2	0.17331	0	0	0	0	0	0	0	0	0	0	4	4	100	0	0	0	0	0	0	0	0	0	2017-05-15	13:48:00
75	O64	7	att	00:02:50	2.5	2017-05-11	00:02:50	2.5		0	14:44:36	M	J	14:47:00	00:02:24	2.24	7	3	1.33929	1	R109	1	14:47:26	2	0.8	0	0	1	0.4	0	0	1	0.4	0	0	NA	NA			NA		NA		NA		NA		2017-05-12	14:45:00
76	L35	10	att	00:01:57	1.57	2017-05-12	00:01:57	1.57		0	13:05:20	K19	O51	13:06:00	00:00:40	0.4	1	2	5	1	O51	1	13:07:17	0	0	2	1.27389	0	0	0	0	2	1.27389	0	0	NA	NA			NA		NA		NA		NA		2017-05-17	13:34:00
77	O65	7	att	00:01:04	1.04	2017-05-12	00:01:04	1.04		0	14:59:59	Q55	Q91	15:01:03	00:01:04	1.04	4	1	0.961538	1	Q55	1	15:01:03	0	0	0	0	0	0	0	0	1	0.961538	0	0	NA	NA			NA		NA		NA		NA		2017-05-18	15:04:00
78	I2	12	att	00:07:16	7.16	2017-05-12	00:07:16	7.16		0	15:08:45	O50	O64	15:10:00	00:01:15	1.15	7	1	0.869565	2	O64	1	15:16:01	2	0.27933	1	0.139665	0	0	1	0.139665	0	0	0	0	4	3	75	25	0	0	0	0	1	25	2	0.5	2017-05-15	15:14:00
79	K11	11	disp	00:13:00	13	2017-05-15	01:00:00	60	10:44:00	1	10:31:00	M	J	10:32:55	00:01:55	1.55	3	1	0.645161	Ø	Ø	Ø	11:31:00	0	0	0	0	0	0	0	0	0	0	0	0	11	3	27.2727	72.7273	0	0	1	9.09091	7	63.6364	6	0.545455	2017-05-17	10:52:00
80	W52	13	att	00:48:49	48.49	2017-05-15	00:48:49	48.49		0	11:51:51	K19	N55	11:53:19	00:01:28	1.28	5	2	1.5625	2	N55	2	12:40:40	11	0.226851	1	0.0206228	1	0.0206228	1	0.0206228	0	0	1	0.0206228	46	32	69.5652	30.4348	1	2.17391	0	0	13	28.2609	3	0.0652174	2017-05-18	11:49:00
81	W56	13	att	00:07:11	7.11	2017-05-15	00:07:11	7.11		0	14:19:45	I2	R50	14:22:00	00:02:15	2.15	7	1	0.465116	2	L35	1	14:26:56	1	0.140647	1	0.140647	0	0	2	0.281294	0	0	0	0	5	3	60	40	0	0	0	0	2	40	1	0.2	2017-05-19	14:34:00
82	P78	6	att	00:19:40	19.4	2017-05-15	00:19:40	19.4		0	14:43:00	P72	M	14:46:00	00:03:00	3	4	2	0.666667	2	M	1	15:02:40	9	0.463918	0	0	0	0	1	0.0515464	0	0	1	0.0515464	16	1	6.25	93.75	1	6.25	6	37.5	15	93.75	5	0.3125	2017-05-16	15:13:00
83	K11	11	att	00:01:05	1.05	2017-05-15	00:01:05	1.05		0	16:16:00	M	saM	16:17:05	00:01:05	1.05	1	3	2.85714	1	J	1	16:17:05	0	0	0	0	0	0	0	0	2	1.90476	0	0	NA	NA			NA		NA		NA		NA		2017-05-19	16:27:00
84	R101	4	disp	00:03:35	3.35	2017-05-16	00:03:33	3.33	12:57:12	0	12:53:37	N50	O64	12:57:01	00:03:24	3.24	6	3	0.925926	2	N50	2	12:57:10	0	0	0	0	0	0	0	0	0	0	0	0	4	3	75	25	0	0	1	25	0	0	1	0.25	2017-05-18	13:00:00
85	H61	27	att	00:34:20	34.2	2017-05-16	00:34:20	34.2		0	14:26:10	R109	K11	14:27:27	00:01:17	1.17	0.5	1	0.854701	1	P72	2	15:00:30	11	0.321637	1	0.0292398	1	0.0292398	0	0	3	0.0877193	1	0.0292398	31	11	35.4839	64.5161	2	6.45161	2	6.45161	17	54.8387	9	0.290323	2017-05-17	14:04:00
86	O64	7	disp	00:14:41	14.41	2017-05-16	00:15:39	15.39	16:33:11	0	16:18:30	O65	L35	16:22:51	00:04:21	4.21	1	6	1.42518	2	M	1	16:34:09	6	0.416378	0	0	0	0	0	0	0	0	0	0	11	1	9.09091	90.9091	0	0	3	27.2727	8	72.7273	5	0.454545	2017-05-18	16:25:00
87	O64	7	att	00:08:51	8.51	2017-05-17	00:08:51	8.51		0	11:22:10	O51	W56	11:25:10	00:03:00	3	5	4	1.33333	1	O50	1	11:31:01	1	0.117509	0	0	0	0	0	0	1	0.117509	0	0	5	5	100	0	0	0	0	0	0	0	0	0	2017-05-31	11:40:00
88	L34	10	disp	00:15:30	15.3	2017-05-18	00:27:12	27.12	10:29:00	0	10:13:30	M	saM	10:16:45	00:03:15	3.15	3	3	0.952381	1	T50	2	10:40:42	4	0.261438	0	0	0	0	0	0	0	0	0	0	8	1	12.5	87.5	0	0	2	25	5	62.5	4	0.5	2017-05-30	10:24:00
89	Q55	18	att	00:28:45	28.45	2017-05-18	00:28:45	28.45		0	10:51:40	H58	R109	11:01:02	00:09:22	9.22	7	6	0.650759	1	N55	2	11:20:25	5	0.175747	0	0	0	0	0	0	1	0.0351494	0	0	27	8	29.6296	70.3704	0	0	3	11.1111	17	62.963	5	0.185185	2017-05-24	11:16:00
90	N50	8	disp	00:07:57	7.57	2017-05-18	00:26:24	26.24	14:27:33	0	14:19:36	M	J	14:21:28	00:01:52	1.52	7	3	1.97368	1	J	1	14:46:00	0	0	0	0	0	0	0	0	0	0	0	0	6	4	66.6667	33.3333	0	0	0	0	2	33.3333	1	0.166667	2017-05-25	14:08:00
91	W56	13	att	00:05:05	5.05	2017-05-19	00:05:05	5.05		0	10:45:45	H61	O51	10:47:10	00:01:25	1.25	4	1	0.8	1	J	1	10:50:50	0	0	1	0.19802	0	0	0	0	1	0.19802	0	0	NA	NA			NA		NA		NA		NA		2017-05-23	11:07:00
92	L34	10	att	00:38:17	38.17	2017-05-19	00:38:17	38.17		0	11:28:50	M	saM	11:31:30	00:02:40	2.4	3	2	0.833333	2	M	1	12:07:07	7	0.18339	1	0.0261986	1	0.0261986	1	0.0261986	0	0	0	0	34	23	67.6471	32.3529	0	0	0	0	11	32.3529	4	0.117647	2017-05-25	11:20:00
93	O64	7	att	00:01:06	1.06	2017-05-19	00:01:06	1.06		0	12:09:47	J	M	12:10:53	00:01:06	1.06	3	1	0.943396	1	J	1	12:10:53	0	0	0	0	0	0	0	0	1	0.943396	0	0	NA	NA			NA		NA		NA		NA		2017-06-02	12:24:00
94	H58	27	att	00:15:40	15.4	2017-05-19	00:15:40	15.4		0	13:45:15	M	Q91	13:49:37	00:04:22	4.22	5	3	0.7109	2	J	2	14:00:55	2	0.12987	0	0	0	0	0	0	0	0	0	0	14	4	28.5714	71.4286	0	0	4	28.5714	9	64.2857	4	0.285714	2017-05-23	13:28:00
95	W56	13	att	00:03:09	3.09	2017-05-19	00:03:09	3.09		0	14:06:32	M	J	14:09:36	00:03:04	3.04	5	5	1.64474	1	J	1	14:09:41	0	0	0	0	2	0.647249	0	0	1	0.323625	0	0	2	0	0	100	0	0	0	0	2	100	1	0.5	2017-05-24	14:20:00
96	R101	4	att	00:02:24	2.24	2017-05-19	00:02:24	2.24		0	15:00:07	M	N50	15:02:31	00:02:24	2.24	4	2	0.892857	2	M	1	15:02:31	0	0	0	0	0	0	0	0	0	0	0	0	NA	NA			NA		NA		NA		NA		2017-05-23	14:48:00
97	R50	17	att	00:36:47	36.47	2017-05-19	00:36:47	36.47		0	15:12:45	R101	N50	15:16:00	00:03:15	3.15	7	2	0.634921	2	saM	1	15:49:32	4	0.109679	2	0.0548396	1	0.0274198	0	0	0	0	0	0	22	7	31.8182	68.1818	0	0	0	0	15	68.1818	5	0.227273	2017-05-23	15:34:00
98	O51	20	att	00:14:23	14.23	2017-05-23	00:14:23	14.23		0	10:03:40	M	Q55	10:12:25	00:08:45	8.45	4	6	0.710059	1	H61	1	10:18:03	6	0.421644	0	0	1	0.0702741	1	0.0702741	1	0.0702741	0	0	12	2	16.6667	83.3333	0	0	1	8.33333	10	83.3333	3	0.25	2017-05-24	10:21:00
99	K11	11	disp	00:00:50	0.5	2017-05-23	00:07:40	7.4	10:31:15	0	10:30:25	M	J	10:36:40	00:06:15	6.15	2	8	1.30081	1	J	1	10:38:05	1	2	0	0	0	0	0	0	0	0	0	0	NA	NA			NA		NA		NA		NA		2017-05-31	10:54:00
100	N50	8	att	00:01:58	1.58	2017-05-23	00:01:58	1.58		0	10:47:10	M	R101	10:48:39	00:01:29	1.29	5	1	0.775194	1	J	1	10:49:08	0	0	0	0	0	0	0	0	1	0.632911	0	0	NA	NA			NA		NA		NA		NA		2017-05-25	10:37:00
101	R101	4	disp	00:09:00	9	2017-05-23	00:47:10	47.1	11:47:10	0	11:38:10	Q55	Q91	11:39:16	00:01:06	1.06	2	1	0.943396	1	H58	1	12:25:20	1	0.111111	0	0	1	0.111111	1	0.111111	0	0	0	0	6	3	50	50	0	0	1	16.6667	3	50	4	0.666667	2017-06-07	11:41:00
102	O65	7	disp	00:05:45	5.45	2017-05-23	00:09:34	9.34	14:03:36	0	13:57:51	M	J	13:59:01	00:01:10	1.1	2	2	1.81818	1	J	1	14:07:25	1	0.183486	0	0	0	0	0	0	0	0	0	0	3	0	0	100	0	0	2	66.6667	2	66.6667	2	0.666667	2017-05-30	14:00:00
103	I2	12	disp	00:09:37	9.37	2017-05-23	00:12:02	12.02	14:21:27	0	14:11:50	O50	Q91	14:16:23	00:04:33	4.33	2	4	0.923788	2	O50	1	14:23:52	2	0.213447	0	0	0	0	1	0.106724	0	0	0	0	5	0	0	100	0	0	2	40	4	80	4	0.8	2017-06-07	14:41:00
104	K11	11	att	00:02:20	2.2	2017-05-23	00:02:20	2.2		0	14:57:20	J	L35	14:58:39	00:01:19	1.19	5	2	1.68067	2	J	2	14:59:40	1	0.454545	0	0	0	0	0	0	0	0	0	0	3	0	0	100	0	0	0	0	3	100	1	0.333333	2017-05-30	14:41:00
105	L35	10	att	00:06:53	6.53	2017-05-23	00:06:53	6.53		0	15:06:13	J	O64	15:13:06	00:06:53	6.53	2	6	0.918836	1	O64	2	15:13:06	4	0.612557	5	0.765697	0	0	0	0	2	0.306279	1	0.153139	3	0	0	100	1	33.3333	2	66.6667	2	66.6667	3	1	2017-05-24	15:02:00
106	O65	7	disp	00:08:30	8.3	2017-05-24	00:29:46	29.46	13:39:30	0	13:31:00	R101	M	13:33:35	00:02:35	2.35	3	3	1.2766	1	K11	1	14:00:46	9	1.08434	0	0	0	0	0	0	0	0	0	0	5	0	0	100	0	0	2	40	3	60	3	0.6	2017-05-25	13:45:00
107	O51	20	disp	00:25:47	25.47	2017-05-24	00:39:29	39.29	14:32:48	0	14:07:01	J	P78	14:09:03	00:02:02	2.02	6	3	1.48515	2	W56	1	14:46:30	6	0.235571	0	0	1	0.0392619	0	0	0	0	0	0	21	7	33.3333	66.6667	0	0	1	4.7619	14	66.6667	3	0.142857	2017-05-31	13:55:00
108	R50	17	att	00:02:14	2.14	2017-05-24	00:02:14	2.14		0	14:46:30	W56	O51	14:48:30	00:02:00	2	5	1	0.5	1	I2	1	14:48:44	0	0	0	0	0	0	0	0	1	0.46729	0	0	NA	NA			NA		NA		NA		NA		2017-05-30	14:20:00
109	N55	8	att	00:03:09	3.09	2017-05-24	00:03:09	3.09		0	15:15:26	K11	L35	15:16:51	00:01:25	1.25	5	2	1.6	1	unk	1	15:18:35	1	0.323625	0	0	0	0	0	0	1	0.323625	0	0	2	2	100	0	0	0	0	0	0	0	0	0	2017-05-30	15:12:00
110	O66	7	neut	01:00:00	60	2017-05-24	01:00:00	60		1	15:26:51	M	saM	15:29:37	00:02:46	2.46	7	4	1.62602	Ø	Ø	Ø	16:26:51	22	0.366667	1	0.0166667	3	0.05	0	0	0	0	2	0.0333333	60	22	36.6667	63.3333	3	5	15	25	31	51.6667	13	0.216667	2017-05-30	15:38:00
111	L34	10	att	00:01:19	1.19	2017-05-25	00:01:19	1.19		0	10:17:13	K18	T50	10:18:32	00:01:19	1.19	7	3	2.52101	1	K18	2	10:18:32	0	0	0	0	0	0	0	0	1	0.840336	0	0	NA	NA			NA		NA		NA		NA		2017-05-31	10:40:00
112	N55	8	att	00:09:38	9.38	2017-05-25	00:09:38	9.38		0	11:04:20	J	W52	11:05:20	00:01:00	1	2	3	3	2	J	1	11:13:58	3	0.319829	1	0.10661	0	0	0	0	0	0	1	0.10661	5	0	0	100	0	0	1	20	5	100	2	0.4	2017-05-31	11:14:00
113	H61	27	disp	00:49:07	49.07	2017-05-25	01:00:00	60	15:50:20	1	15:01:13	W56	M	15:04:05	00:02:52	2.52	5	2	0.793651	Ø	Ø	Ø	16:01:13	10	0.203791	0	0	1	0.0203791	0	0	0	0	0	0	45	14	31.1111	68.8889	2	4.44444	3	6.66667	31	68.8889	6	0.133333	2017-05-31	14:57:00
114	O51	20	att	00:01:40	1.4	2017-05-25	00:01:40	1.4		0	16:26:50	M	O65	16:28:30	00:01:40	1.4	3	1	0.714286	1	K19	2	16:28:30	0	0	0	0	0	0	0	0	1	0.714286	0	0	NA	NA			NA		NA		NA		NA		2017-05-30	16:49:00
115	Q55	18	att	00:22:14	22.14	2017-05-30	00:22:14	22.14		0	13:21:45	P78	O65	13:35:40	00:13:55	13.55	1	3	0.221402	2	J	2	13:43:59	6	0.271003	0	0	0	0	0	0	0	0	0	0	22	3	13.6364	86.3636	0	0	2	9.09091	19	86.3636	6	0.272727	2017-06-02	12:51:00
116	W56	13	disp	00:09:57	9.57	2017-05-31	01:00:00	60	12:01:57	1	11:52:00	O50	H61	11:57:59	00:05:59	5.59	3	4	0.715564	Ø	Ø	Ø	12:52:00	4	0.417973	0	0	0	0	0	0	0	0	0	0	7	0	0	100	0	0	0	0	7	100	2	0.285714	2017-06-05	12:10:00
117	O51	20	att	00:01:56	1.56	2017-05-31	00:01:56	1.56		0	16:28:20	R101	N50	16:30:16	00:01:56	1.56	3	2	1.28205	1	F51	1	16:30:16	0	0	0	0	0	0	0	0	1	0.641026	0	0	2	0	0	100	2	100	0	0	0	0	1	0.5	2017-06-01	16:13:00
118	O65	7	att	00:06:10	6.1	2017-06-01	00:06:10	6.1		0	11:21:02	M	Q91	11:27:12	00:06:10	6.1	2	4	0.655738	1	J	1	11:27:12	4	0.655738	0	0	0	0	0	0	1	0.163934	1	0.163934	4	0	0	100	2	50	3	75	1	25	2	0.5	2017-06-14	10:55:00
119	L35	10	att	00:04:15	4.15	2017-06-01	00:04:15	4.15		0	11:32:35	Q55	W56	11:33:51	00:01:16	1.16	5	3	2.58621	1	O51	1	11:36:50	2	0.481928	1	0.240964	1	0.240964	0	0	1	0.240964	0	0	3	1	33.3333	66.6667	0	0	0	0	2	66.6667	3	1	2017-06-05	11:54:00
120	I2	12	att	00:52:03	52.03	2017-06-01	00:52:03	52.03		0	11:39:58	O64	Q91	11:42:10	00:02:12	2.12	5	4	1.88679	1	M	1	12:32:01	11	0.211416	1	0.0192197	0	0	0	0	1	0.0192197	0	0	50	23	46	54	0	0	1	2	26	52	7	0.14	2017-06-07	12:02:00
121	R50	17	att	00:02:12	2.12	2017-06-01	00:02:12	2.12		0	13:55:48	M	O66	13:57:41	00:01:53	1.53	7	2	1.30719	2	I2	1	13:58:00	1	0.471698	0	0	0	0	0	0	0	0	0	0	2	0	0	100	1	50	0	0	1	50	2	1	2017-06-07	14:13:00
122	Q55	18	att	00:04:22	4.22	2017-06-01	00:04:22	4.22		0	14:26:00	J	K11	14:30:22	00:04:22	4.22	0.5	4	0.947867	1	J	1	14:30:22	0	0	0	0	0	0	0	0	1	0.236967	0	0	NA	NA			NA		NA		NA		NA		2017-06-09	14:31:00
123	H61	27	disp	00:14:41	14.41	2017-06-01	00:44:45	44.45	14:52:15	0	14:37:34	K19	O51	15:07:15	00:29:41	29.41	3	9	0.306018	1	K19	2	15:22:19	7	0.485774	0	0	0	0	0	0	0	0	0	0	13	0	0	100	0	0	10	76.9231	9	69.2308	3	0.230769	2017-06-02	14:26:00
124	N50	8	disp	00:21:12	21.12	2017-06-01	00:25:30	25.3	16:43:42	1	16:22:30	P72	I2	16:29:50	00:07:20	7.2	7	5	0.694444	NA	NA	NA	16:48:00	8	0.378788	1	0.0473485	0	0	0	0	1	0.0473485	1	0.0473485	18	0	0	100	1	5.55556	5	27.7778	18	100	5	0.277778	2016-06-14	16:06:00
125	R50	17	att	00:16:12	16.12	2017-06-02	00:16:12	16.12		0	10:11:17	E50	O51	10:27:29	00:16:12	16.12	6	5	0.310174	1	I2	1	10:27:29	18	1.11663	0	0	1	0.0620347	0	0	1	0.0620347	0	0	14	1	7.14286	92.8571	0	0	1	7.14286	13	92.8571	4	0.285714	2017-06-07	10:19:00
126	O65	7	disp	00:07:43	7.43	2017-06-02	00:10:18	10.18	10:42:40	0	10:34:57	P78	J	10:38:02	00:03:05	3.05	4	3	0.983607	1	unk	2	10:45:15	1	0.13459	0	0	1	0.13459	0	0	0	0	0	0	6	0	0	100	3	50	4	66.6667	5	83.3333	5	0.833333	2017-06-05	10:43:00
127	W52	13	att	00:47:15	47.15	2017-06-02	00:47:15	47.15		0	11:17:05	saM	K19	11:18:50	00:01:45	1.45	5	1	0.689655	2	M	1	12:04:20	14	0.296925	1	0.0212089	4	0.0848356	7	0.148462	0	0	1	0.0212089	40	11	27.5	72.5	0	0	9	22.5	26	65	8	0.2	2017-06-08	11:08:00
128	N50	8	neut	01:00:00	60	2017-06-02	01:00:00	60		1	15:14:02	N55	W52	15:18:50	00:04:48	4.48	5	1	0.223214	Ø	Ø	Ø	16:14:02	13	0.216667	5	0.0833333	3	0.05	1	0.0166667	2	0.0333333	3	0.05	56	8	14.2857	85.7143	8	14.2857	8	14.2857	38	67.8571	13	0.232143	2017-06-11	15:08:00
129	H61	27	disp	00:10:55	10.55	2017-06-05	01:00:00	60	11:02:40	1	10:51:45	Q55	M	10:53:01	00:01:16	1.16	6	2	1.72414	Ø	Ø	Ø	11:51:45	2	0.189573	0	0	0	0	0	0	0	0	0	0	8	5	62.5	37.5	0	0	0	0	3	37.5	3	0.375	2017-06-07	10:59:00
130	H61	27	att	00:03:06	3.06	2017-06-07	00:03:06	3.06		0	14:25:30	M	saM	14:27:05	00:01:35	1.35	3	2	1.48148	1	L35	2	14:28:36	1	0.326797	1	0.326797	0	0	0	0	1	0.326797	0	0	NA	NA			NA		NA		NA		NA		2017-06-09	14:10:00
131	W56	13	att	00:54:10	54.1	2017-06-07	00:54:10	54.1		0	15:00:00	H61	O50	15:05:32	00:05:32	5.32	3	5	0.93985	2	M	1	15:54:10	25	0.462107	0	0	4	0.0739372	1	0.0184843	1	0.0184843	2	0.0369686	47	0	0	100	24	51.0638	16	34.0426	41	87.234	9	0.191489	2017-06-08	15:30:00
132	O66	7	disp	00:31:48	31.48	2017-06-08	01:00:00	60	14:18:44	1	13:46:56	H61	J	13:49:54	00:02:58	2.58	3	3	1.16279	Ø	Ø	Ø	14:46:56	8	0.25413	1	0.0317662	1	0.0317662	0	0	2	0.0635324	2	0.0635324	30	1	3.33333	96.6667	6	20	11	36.6667	13	43.3333	8	0.266667	2017-06-11	14:24:00
133	N50	8	att	00:02:12	2.12	2017-06-08	00:02:12	2.12		0	15:13:45	saM	O66	15:15:57	00:02:12	2.12	1	3	1.41509	2	R101	1	15:15:57	0	0	0	0	0	0	0	0	0	0	0	0	2	0	0	100	0	0	0	0	2	100	3	1.5	2017-06-09	14:58:00
134	R101	4	att	00:01:13	1.13	2017-06-09	00:01:13	1.13		0	10:16:37	E50	J	10:17:50	00:01:13	1.13	7	2	1.76991	1	M	1	10:17:50	0	0	0	0	1	0.884956	0	0	1	0.884956	0	0	NA	NA			NA		NA		NA		NA		2017-06-12	10:12:00
135	O66	7	att	00:27:47	27.47	2017-06-09	00:27:47	27.47		0	10:49:34	M	H61	10:52:25	00:02:51	2.51	6	3	1.19522	1	W56	1	11:17:21	8	0.291227	0	0	0	0	0	0	1	0.0364033	0	0	27	7	25.9259	74.0741	0	0	3	11.1111	18	66.6667	9	0.333333	2017-06-10	11:11:00
136	K11	11	att	00:02:57	2.57	2017-06-09	00:02:57	2.57		0	11:42:30	P78	O65	11:44:20	00:01:50	1.5	1	2	1.33333	2	H58	1	11:45:27	0	0	2	0.77821	0	0	1	0.389105	1	0.389105	0	0	NA	NA			NA		NA		NA		NA		2017-06-12	11:12:00
137	N55	8	att	00:02:07	2.07	2017-06-09	00:02:07	2.07		0	11:49:41	P72	I2	11:51:48	00:02:07	2.07	6	1	0.483092	2	W52	2	11:51:48	0	0	0	0	0	0	0	0	0	0	0	0	NA	NA			NA		NA		NA		NA		2017-06-15	11:30:00
138	N50	8	att	00:18:42	18.42	2017-06-09	00:18:42	18.42		0	12:00:55	O66	J	12:13:38	00:12:43	12.43	1	7	0.563154	2	J	1	12:19:37	8	0.434311	0	0	1	0.0542888	0	0	0	0	1	0.0542888	16	0	0	100	5	31.25	2	12.5	14	87.5	6	0.375	2017-06-13	11:58:00
139	I2	12	att	00:18:50	18.5	2017-06-09	00:18:50	18.5		0	13:20:35	J	L35	13:21:50	00:01:15	1.15	5	3	2.6087	1	L35	1	13:39:25	10	0.540541	1	0.0540541	0	0	0	0	2	0.108108	1	0.0540541	17	2	11.7647	88.2353	5	29.4118	8	47.0588	7	41.1765	2	0.117647	2017-06-15	13:24:00
140	O65	7	att	00:05:43	5.43	2017-06-09	00:05:43	5.43		0	13:41:15	M	J	13:42:45	00:01:30	1.3	2	1	0.769231	1	Q91	2	13:46:58	0	0	1	0.184162	0	0	0	0	1	0.184162	0	0	4	0	0	100	0	0	4	100	4	100	3	0.75	2017-06-12	13:23:00
141	N55	8	att	00:21:23	21.23	2017-06-09	00:21:23	21.23		0	16:04:55	O50	P72	16:15:34	00:10:39	10.39	5	5	0.481232	1	J	1	16:26:18	7	0.329722	0	0	1	0.0471032	1	0.0471032	1	0.0471032	1	0.0471032	16	0	0	100	2	12.5	7	43.75	8	50	8	0.5	2017-06-12	15:39:00
142	N55	8	att	00:28:18	28.18	2017-06-12	00:28:18	28.18		0	10:25:24	O51	T50	10:32:12	00:06:48	6.48	7	7	1.08025	1	M	1	10:53:42	3	0.106458	0	0	1	0.0354862	2	0.0709723	3	0.106458	2	0.0709723	26	4	15.3846	84.6154	0	0	6	23.0769	18	69.2308	8	0.307692	2017-06-13	10:16:00
143	N50	8	att	00:01:40	1.4	2017-06-12	00:01:40	1.4		0	11:29:15	J	L35	11:30:55	00:01:40	1.4	0	2	1.42857	1	J	1	11:30:55	0	0	1	0.714286	0	0	0	0	1	0.714286	0	0	NA	NA			NA		NA		NA		NA		2017-06-14	11:57:00
144	L34	10	att	00:06:38	6.38	2017-06-12	00:06:38	6.38		0	11:42:00	N55	W52	11:48:35	00:06:35	6.35	1.5	4	0.629921	1	N55	3	11:48:38	2	0.31348	0	0	0	0	0	0	1	0.15674	0	0	3	0	0	100	0	0	3	100	0	0	2	0.666667	2017-06-15	11:39:00
145	R101	4	att	00:10:17	10.17	2017-06-12	00:10:17	10.17		0	12:00:00	O66	H58	12:01:40	00:01:40	1.4	1	1	0.714286	1	J	1	12:10:17	3	0.294985	0	0	0	0	0	0	1	0.0983284	0	0	7	1	14.2857	85.7143	0	0	2	28.5714	6	85.7143	7	1	2017-06-13	11:35:00
146	R50	17	att	00:15:14	15.14	2017-06-12	00:15:14	15.14		0	13:34:45	U55	M	13:48:00	00:13:15	13.15	5	3	0.228137	2	M	1	13:49:59	6	0.396301	0	0	0	0	0	0	0	0	0	0	14	0	0	100	0	0	0	0	14	100	3	0.214286	2017-06-13	13:55:00
147	I2	12	disp	00:11:56	11.56	2017-06-12	00:33:46	33.46	14:18:57	0	14:07:01	H61	Q55	14:13:35	00:06:34	6.34	2.5	4	0.630915	2	P72	3	14:40:47	0	0	0	0	0	0	0	0	0	0	0	0	11	1	9.09091	90.9091	0	0	1	9.09091	9	81.8182	2	0.181818	2017-06-13	14:32:00
148	O65	7	att	00:17:52	17.52	2017-06-12	00:17:52	17.52		0	14:56:03	J	P78	15:13:20	00:17:17	17.17	0.5	10	0.582411	1	J	1	15:13:55	8	0.456621	2	0.114155	0	0	2	0.114155	0	0	0	0	17	0	0	100	17	100	1	5.88235	0	0	2	0.117647	2017-06-14	15:08:00
149	O51	20	att	00:02:52	2.52	2017-06-12	00:02:52	2.52		0	15:22:42	F53	L34	15:24:20	00:01:38	1.38	7	1	0.724638	1	Q55	1	15:25:34	0	0	0	0	0	0	0	0	1	0.396825	0	0	2	0	0	100	0	0	1	50	1	50	1	0.5	2017-06-13	15:41:00
150	H61	27	att	00:02:33	2.33	2017-06-12	00:02:33	2.33		0	16:04:03	M	saM	16:05:50	00:01:47	1.47	1	1	0.680272	1	M	1	16:06:36	0	0	0	0	2	0.858369	1	0.429185	1	0.429185	0	0	NA	NA			NA		NA		NA		NA		2017-06-13	16:16:00
151	L34	10	att	00:01:24	1.24	2017-06-13	00:01:24	1.24		0	11:16:52	unk	O50	11:18:16	00:01:24	1.24	0	3	2.41935	1	N55	2	11:18:16	1	0.806452	1	0.806452	0	0	0	0	2	1.6129	1	0.806452	NA	NA			NA		NA		NA		NA		2017-06-15	10:50:00
152	W52	13	att	00:07:31	7.31	2017-06-13	00:07:31	7.31		0	13:31:01	N55	saM	13:36:10	00:05:09	5.09	0.5	4	0.785855	1	N55	2	13:38:32	6	0.820793	0	0	0	0	0	0	0	0	0	0	6	2	33.3333	66.6667	0	0	1	16.6667	4	66.6667	2	0.333333	2017-06-15	13:54:00
153	K19	11	att	00:07:58	7.58	2017-06-14	00:07:58	7.58		0	10:43:50	O51	K18	10:45:01	00:01:11	1.11	1	2	1.8018	2	H58	1	10:51:48	1	0.131926	1	0.131926	0	0	0	0	1	0.131926	1	0.131926	5	0	0	100	4	80	1	20	5	100	3	0.6	2017-06-15	10:28:00
154	O65	7	att	00:06:25	6.25	2017-06-14	00:06:25	6.25		0	14:30:32	J	O50	14:32:38	00:02:06	2.06	3	3	1.45631	1	P78	1	14:36:57	1	0.16	2	0.32	1	0.16	0	0	1	0.16	0	0	5	0	0	100	0	0	2	40	5	100	9	1.8	2017-06-15	14:33:00
[truncated: 38 more columns]

## Sheet: Variables in full dataset
	Label	Unit	Description
	POG/MC_pair	Number	Number of the Post-Observing Grooming / Matched Control pair
	Focal_ID	ID	ID of the focal individual
	Focal_age	Number	Age of the focal
	Pair's type	"att" or "disp" or "neut"	att = attracted pairs / disp = dispersed pairs / neut = neutral pairs
	POG/MC_duration	Duration (hh:mm:ss)	Duration of the POG/MC pairs (same duration for the POG and the MC)
	POG/MC_duration_min	Duration (min)	Duration of the POG/MC pairs (same duration for the POG and the MC)
POG = Post-Observing Grooming
	POG_Date	Date (dd/mm/yyyy)	Date at which the POG was collected
	POG_Duration	Duration (hh:mm:ss)	Total duration of the observation from the start of the grooming interaction observed by the focal to the next grooming interaction involving the focal.
	POG_Duration_min	Duration (min)	Total duration of the observation from the start of the grooming interaction observed by the focal to the next grooming interaction involving the focal.
	POG_end_time_treated	Time (hh:mm:ss)	When there was a Grooming interaction during the MC, the same length than the MC was treated for the POG
	POG_noGI	1 or 0	No grooming interaction involving the focal was observed after 1 hour of observation. 1 = yes / 0 = no.
	POG_Start	Time (hh:mm:ss)	Start of the POG
	POG_Groomee	ID	ID of the individual who received the grooming (when the ID was not known: M=adult male / F=adult female / saM=subadult male / saF=subadult female / J=juvenile )
	POG_Groomer	ID	ID of the individual who donated the grooming (when the ID was not known: M=adult male / F=adult female / saM=subadult male / saF=subadult female / J=juvenile )
	POG_GI_end	Time (hh:mm:ss)	Time of the end of the grooming interaction observed by the focal or at which the focal was at more than 7 meters to the grooming couple.
	POG_GI_duration	Duration (hh:mm:ss)	Duration of the Grooming interaction observed by the focal
	POG_GI_duration_min	Duration (min)	Duration of the Grooming interaction observed by the focal
	POG_Distance_Mini	Meters	Distance minimal between the focal and the grooming couple
	POG_VA	Number	Number of time the focal looked in the direction of the grooming couple
	POG_VA_rate	Rate / min	Rate per minute of time the focal looked in the direction of the grooming couple
	POG_NGI_initiator	1 or 2 or Ø	Does the focal initiated the next grooming interaction? 1 = yes / 2 = no (Ø=No grooming interaction observed after one hour of observation)
	POG_Partner_ID	ID or Ø	ID of the grooming partner (when the ID was not known: M=adult male / F=adult female / saM=subadult male / saF=subadult female / J=juvenile) or Ø=No grooming interaction observed after one hour of observation
	POG_Direction_GI	1 or 2 or 3 or Ø	1 = the focal is the groomer / 2 = the focal is the groomee / 3 = bidirectional (Ø=No grooming interaction observed after one hour of observation)
	POG_end	Time (hh:mm:ss)	End of the POG
	POG_tot_SDB	Number	Occurrence of total SDB (scratch+self-grooming+yawn+body-shake)
	POG_tot_SDB_rate	Rate / min	Rate per minute of total SDB
	POG_Affi	Number	Occurrence of affiliative interactions
	POG_Affi_rate	Rate / min	Rate per minute of affiliative interactions
	POG_Agg	Number	Occurrence of aggressive behaviour
	POG_Agg_rate	Rate / min	Rate per minute of aggressive behaviour
	POG_submi	Number	Occurrence of submitive behaviours
	POG_submi_rate	Rate / min	Rate per minute of submitive behaviours
	POG_App	Number	Occurrence of time the focal approached another individual
	POG_App_rate	Rate / min	Rate per minute the focal approached another individual
	POG_Leave	Number	Occurrence of time the focal left another individual
	POG_Leave_rate	Rate / min	Rate per minute the focal left another individual
	POG_scan_tot	Number	Number of data points collected (1 point per minute)
	POG_no-neigh	Number	Number of data points there was no neighbour into 5 meter radius to the focal
	POG_noneigh_%	% of time	Percentage of time there was no neighbour into 5 meter radius to the focal
	POG_neigh_0-5	% of time	Percentage of time there was at least 1 individual within 5 m radius to the focal
	POG_neigh_0-1	Number	Number of data points there was at least 1 individual into 1 meter radius to the focal
	POG_neigh_0-1_%	% of time	Percentage of time there was at least 1 individual into 1 meter radius to the focal
	POG_neigh_1-2	Number	Number of data points there was at least 1 individual between 1 and 2 meters radius to the focal
	POG_neigh_1-2_%	% of time	Percentage of time there was at least 1 individual between 1 and 2 meters radius to the focal
	POG_neigh_2-5	Number	Number of data points there was at least 1 individual between 2 and 5 meters radius to the focal
	POG_neigh_2-5_%	% of time	Percentage of time there was at least 1 individual between 2 and 5 meters radius to the focal
	POG_numb_neigh	Number	Total number of different individuals into 5 meters radius to the focal
	POG_numb_neigh_rate	Rate / min	Rate per minute of different individuals into 5 meters radius to the focal
MC = Matched Control
	MC_Date	Date (dd/mm/yyyy)	Date at which the MC was collected
	MC_Start	Time (hh:mm:ss)	Start of the MC
	MC_End	Time (hh:mm:ss)	End of the MC (determined by the duration of the corresponding POG or because the focal individual became involved in a grooming interaction)
	MC_Duration	Duration (min)	Total duration of the observation (same amount of time than the corresponding POG or until the NGI if any)
	MC_end_time_treated	Time (hh:mm:ss)	Calculated to have exactly the same time than de POG
	MC_tot_SDB	Number	Occurrence of total SDB (scratch+self-grooming+yawn+body-shake)
	MC_tot_SDB_rate	Rate / min	Rate per minute of total SDB
	MC_Affi	Number	Occurrence of affiliative interactions
	MC_Affi_rate	Rate / min	Rate per minute of affiliative interactions
	MC_Agg	Number	Occurrence of aggressive behaviour
	MC_Agg_rate	Rate / min	Rate per minute of aggressive behaviour
	MC_submi	Number	Occurrence of submitive behaviours
	MC_submi_rate	Rate / min	Rate per minute of submitive behaviours
	MC_App	Number	Occurrence of time the focal approached another individual
	MC_App_rate	Rate / min	Rate per minute the focal approached another individual
	MC_Leave	Number	Occurrence of time the focal left another individual
	MC_Leave_rate	Rate / min	Rate per minute the focal left another individual
	MC_scan_tot	Number	Number of data points collected (1 point per minute)
	MC_no-neigh	Number	Number of data points there was no neighbour into 5 meter radius to the focal
	MC_no-neigh_percent	% of time	Percentage of time there was no neighbour into 5 meter radius to the focal
	MC_neigh_0-5	% of time	Percentage of time there was at least 1 individual within 5 m radius to the focal
	MC_neigh_0-1	Number	Number of data points there was at least 1 individual into 1 meter radius to the focal
	MC_neigh_0-1_%	% of time	Percentage of time there was at least 1 individual into 1 meter radius to the focal
	MC_neigh_1-2	Number	Number of data points there was at least 1 individual between 1 and 2 meters radius to the focal
	MC_neigh_1-2_%	% of time	Percentage of time there was at least 1 individual between 1 and 2 meters radius to the focal
	MC_neigh_2-5	Number	Number of data points there was at least 1 individual between 2 and 5 meters radius to the focal
	MC_neigh_2-5_%	Number	Percentage of time there was at least 1 individual between 2 and 5 meters radius to the focal
	MC_numb_neigh	Number	Total number of different individuals into 5 meters radius to the focal
	MC_numb_neigh_rate	RATE/MIN	Rate per minute of different individuals into 5 meters radius to the focal
	GI_during_MC	1 or 0	Was the focal involved in a grooming interaction during the MC? 1 = yes / 0 = no
	MC_GI_Initiator	1 or 2 or "blank"	Does the focal initiated the next grooming interaction? 1 = yes / 2 = no ("blank" = the grooming interaction was not observed)
	MC_Partner_ID	ID or "blank"	ID of the grooming partner (when the ID was not known: M=adult male / F=adult female / saM=subadult male / saF=subadult female / J=juvenile) or "blank" = the grooming interaction was not observed
	MC_GI_Direction	1 or 2 or 3 or "blank"	1 = the focal is the groomer / 2 = the focal is the groomee / 3 = bidirectional ("blank" = the grooming interaction was not observed)
PostMC = Time after the end of the MC during which the observer still conitued to follow and observe the focal individual
	PostMC_NGI_start	Time (hh:mm:ss) or "blank"	Time of the next grooming interaction involoving the focal if any ("blank" = the grooming interaction was not observed)
	PostMC_additional_time	Duration (hh:mm:ss)	Additional time after the end of the MC during which the focal individual was still followed and observed by the observer
	PostMC_END	Time (hh:mm:ss)	End of the MC + Post MC period
	Duration_MC+PostMC	Duration (hh:mm:ss)	Duration of the MC + Post MC
	PostMC_NGI_Initiator	1 or 2 or "blank"	Does the focal initiated the next grooming interaction? 1 = yes / 2 = no ("blank" = the grooming interaction was not observed)
	PostMC_Partner	ID or "blank"	ID of the grooming partner (when the ID was not known: M=adult male / F=adult female / saM=subadult male / saF=subadult female / J=juvenile) or "blank" = the grooming interaction was not observed
	PostMC_NGI_Direction	1 or 2 or 3 or "blank"	1 = the focal is the groomer / 2 = the focal is the groomee / 3 = bidirectional ("blank" = the grooming interaction was not observed)

## Sheet: Spearman correlations
Focal animal		Visual Attention v time to next grooming
	N	rs	p
R101	6	-0.371	0.468
P78	5	0	1
O64	10	0.139	0.701
O65	10	-0.067	0.855
O66	6	-0.319	0.538
N50	9	-0.4	0.286
N55	8	0.108	0.799
L34	10	-0.77	0.009
L35	10	-0.483	0.187
K11	9	-0.895	0.001
K19	6	-0.486	0.329
I2	9	0.192	0.62
W52	6	0.029	0.957
W56	9	-0.286	0.493
R50	9	0.2	0.606
Q55	7	0.536	0.215
O51	8	-0.287	0.49
H58	6	-0.2	0.704
H61	8	-0.072	0.866
These are the results of Spearman's correlations between rate of viual attention and time to next grooming bout during POG.
